# Supplementary material for: Mixing Li and Cs in the reduction of corannulene for the assembly of a cesium-capped sandwich with a hexanuclear heterometallic core
Source: Royal Society of Chemistry journal article supplement (doi:10.1039/c6dt04521a), 2017-01-01
Supplement: c6dt04521a1.pdf [file c6dt04521a1.pdf]

## Supporting Information

### Mixing Li and Cs in Reduction of Corannulene for Assembly of Cesium-Capped Sandwich with Hexanuclear Heterometallic Core

Sarah N. Spisak, Zheng Wei, and Marina A. Petrukhina\*

*Department of Chemistry, University at Albany, State University of New York, Albany, NY  
12222, USA*

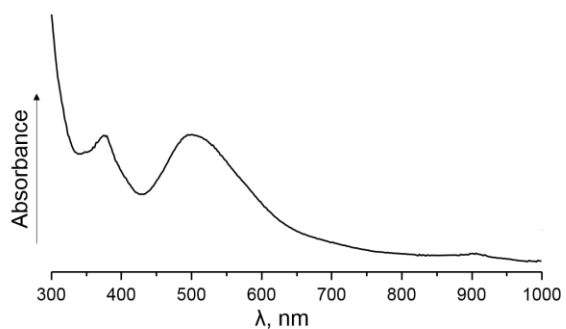

**Figure S1.** UV-Vis spectrum of **2** in diglyme (374 nm and 494 nm).

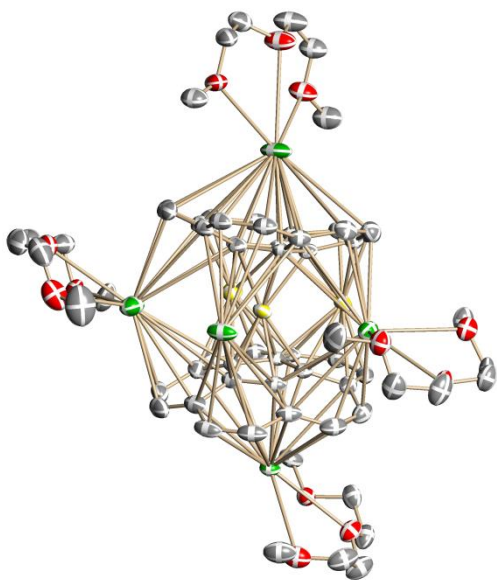

**Figure S2.** ORTEP drawing of the asymmetric unit of **2** with thermal ellipsoids at the 40% probability level. Hydrogens are omitted for clarity. Color scheme used: Li yellow, Cs green, O red, C grey.
